# Supplementary material
Source: MDPI journal article supplement (https://www.mdpi.com/2073-4441/11/8/1640)
Supplement: s1 [file s1]

**Table S1.** Bacterial diversity indices of different C/N ratio treatments as determined by Illumina MiSeq sequencing analysis.

| Groups | OTUs   | Chao1  | ACE    | Shannon   | Simpson     | Coverage (%) |
|--------|--------|--------|--------|-----------|-------------|--------------|
| P0     | 489±12 | 570±6  | 557±6  | 4.14±0.11 | 0.049±0.005 | 99.76±0.04   |
| G1     | 580±8  | 666±19 | 653±9  | 4.46±0.02 | 0.030±0.001 | 99.74±0.01   |
| G2     | 599±23 | 695±34 | 689±39 | 4.44±0.03 | 0.030±0.002 | 99.73±0.04   |
| G3     | 564±23 | 655±22 | 652±24 | 4.34±0.09 | 0.034±0.002 | 99.70±0.06   |
| G4     | 578±19 | 670±33 | 664±27 | 4.55±0.1  | 0.030±0.003 | 99.73±0.05   |
| T1     | 545±27 | 644±30 | 640±5  | 3.36±0.3  | 0.113±0.025 | 99.76±0.04   |
| T2     | 654±12 | 751±20 | 736±19 | 4.39±0.12 | 0.041±0.007 | 99.77±0.02   |
| T3     | 602±10 | 702±24 | 685±17 | 4.77±0.06 | 0.017±0.002 | 99.73±0.00   |
| T4     | 578±24 | 665±21 | 667±19 | 4.44±0.08 | 0.034±0.005 | 99.73±0.04   |
| F1     | 513±6  | 635±65 | 614±41 | 3.73±0.05 | 0.070±0.006 | 99.73±0.07   |
| F2     | 535±25 | 656±50 | 646±37 | 3.64±0.16 | 0.084±0.010 | 99.73±0.03   |
| F3     | 613±19 | 726±44 | 702±35 | 4.4±0.04  | 0.041±0.003 | 99.73±0.04   |
| F4     | 577±9  | 669±27 | 665±13 | 4.53±0.05 | 0.031±0.003 | 99.74±0.03   |

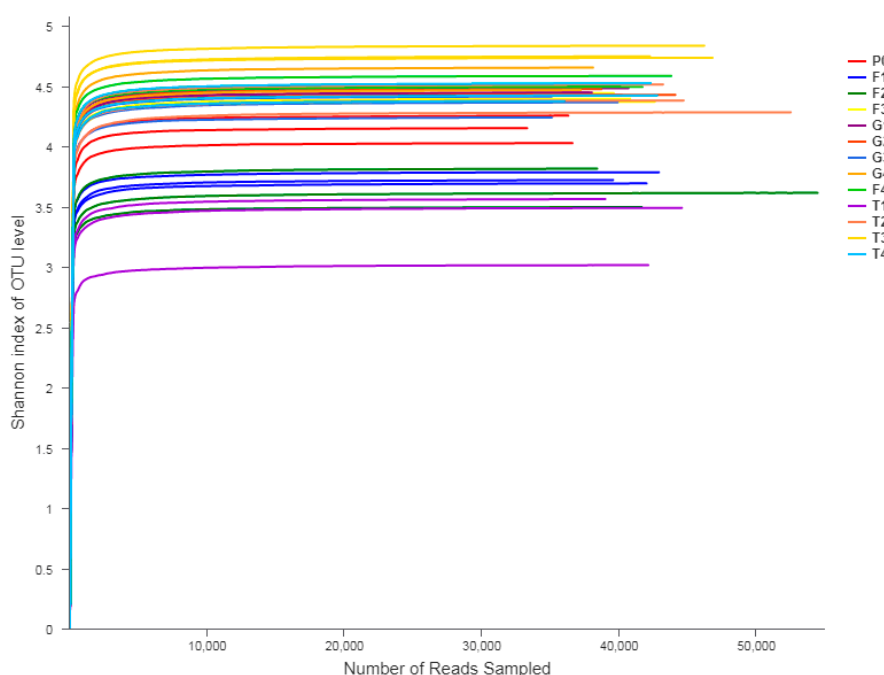

**Figure S1**  $\alpha$ -Diversity comparison. Rarefaction curves for Shannon index was calculated

using Mothur (v1.27.0) for each sample using 0.03 distance OTUs. P0 was the DNA sample on day 1. The entire experimental cycle was divided into three periods, grow period (GP): day 1 to day 9; treatment period (TP): day 10 to day 19; finish period (FP): day 20 to day 29. DNA samples were extracted at the end of each period, and named G1-G4, T1-T4, F1-F4, the

sequence of ordinal numbers represents treatments C/N 10, C/N 15, C/N 20 and C/N 25, respectively.
